# Supplementary material
Source: PubMed Central journal article supplement (PMC4388821)

1 **SUPPLEMENTAL FIGURE LEGEND**

2 **Fig. E1.** JTE-013, a S1PR2 antagonist, reduces passive systemic anaphylaxis and  
3 allergic lung infiltration in MC-reconstituted *Kit*<sup>W-sh/W-sh</sup>. MC-reconstituted *Kit*<sup>W-sh/W-sh</sup>  
4 were treated as previously described (Fig. 6). Body temperature monitoring (A) Flow  
5 cytometric analysis of CD3- and CD14-positive cells in mice lungs 90 minutes after Ag  
6 challenge. Gray histograms represent isotype controls staining, unfilled solid lines depict  
7 Rec. *Kit*<sup>W-sh/W-sh</sup> vehicle-treated lung cells and unfilled dotted lines, Rec. *Kit*<sup>W-sh/W-sh</sup> JTE-  
8 013-treated lung cells (B). Graphs represent corresponding percentages of CD3<sup>+</sup> or  
9 CD14<sup>+</sup> cells, total cell, CD3<sup>+</sup> or CD14<sup>+</sup> cell numbers in the lungs (C). Serum levels of  
10 MCP-1/CCL2 and RANTES/CCL5 90 minutes after the Ag challenge (D). (\*  $p < 0.05$ , ^  $p$   
11  $< 0.0001$ , Student's  $t$ -test).

12

Figure E1

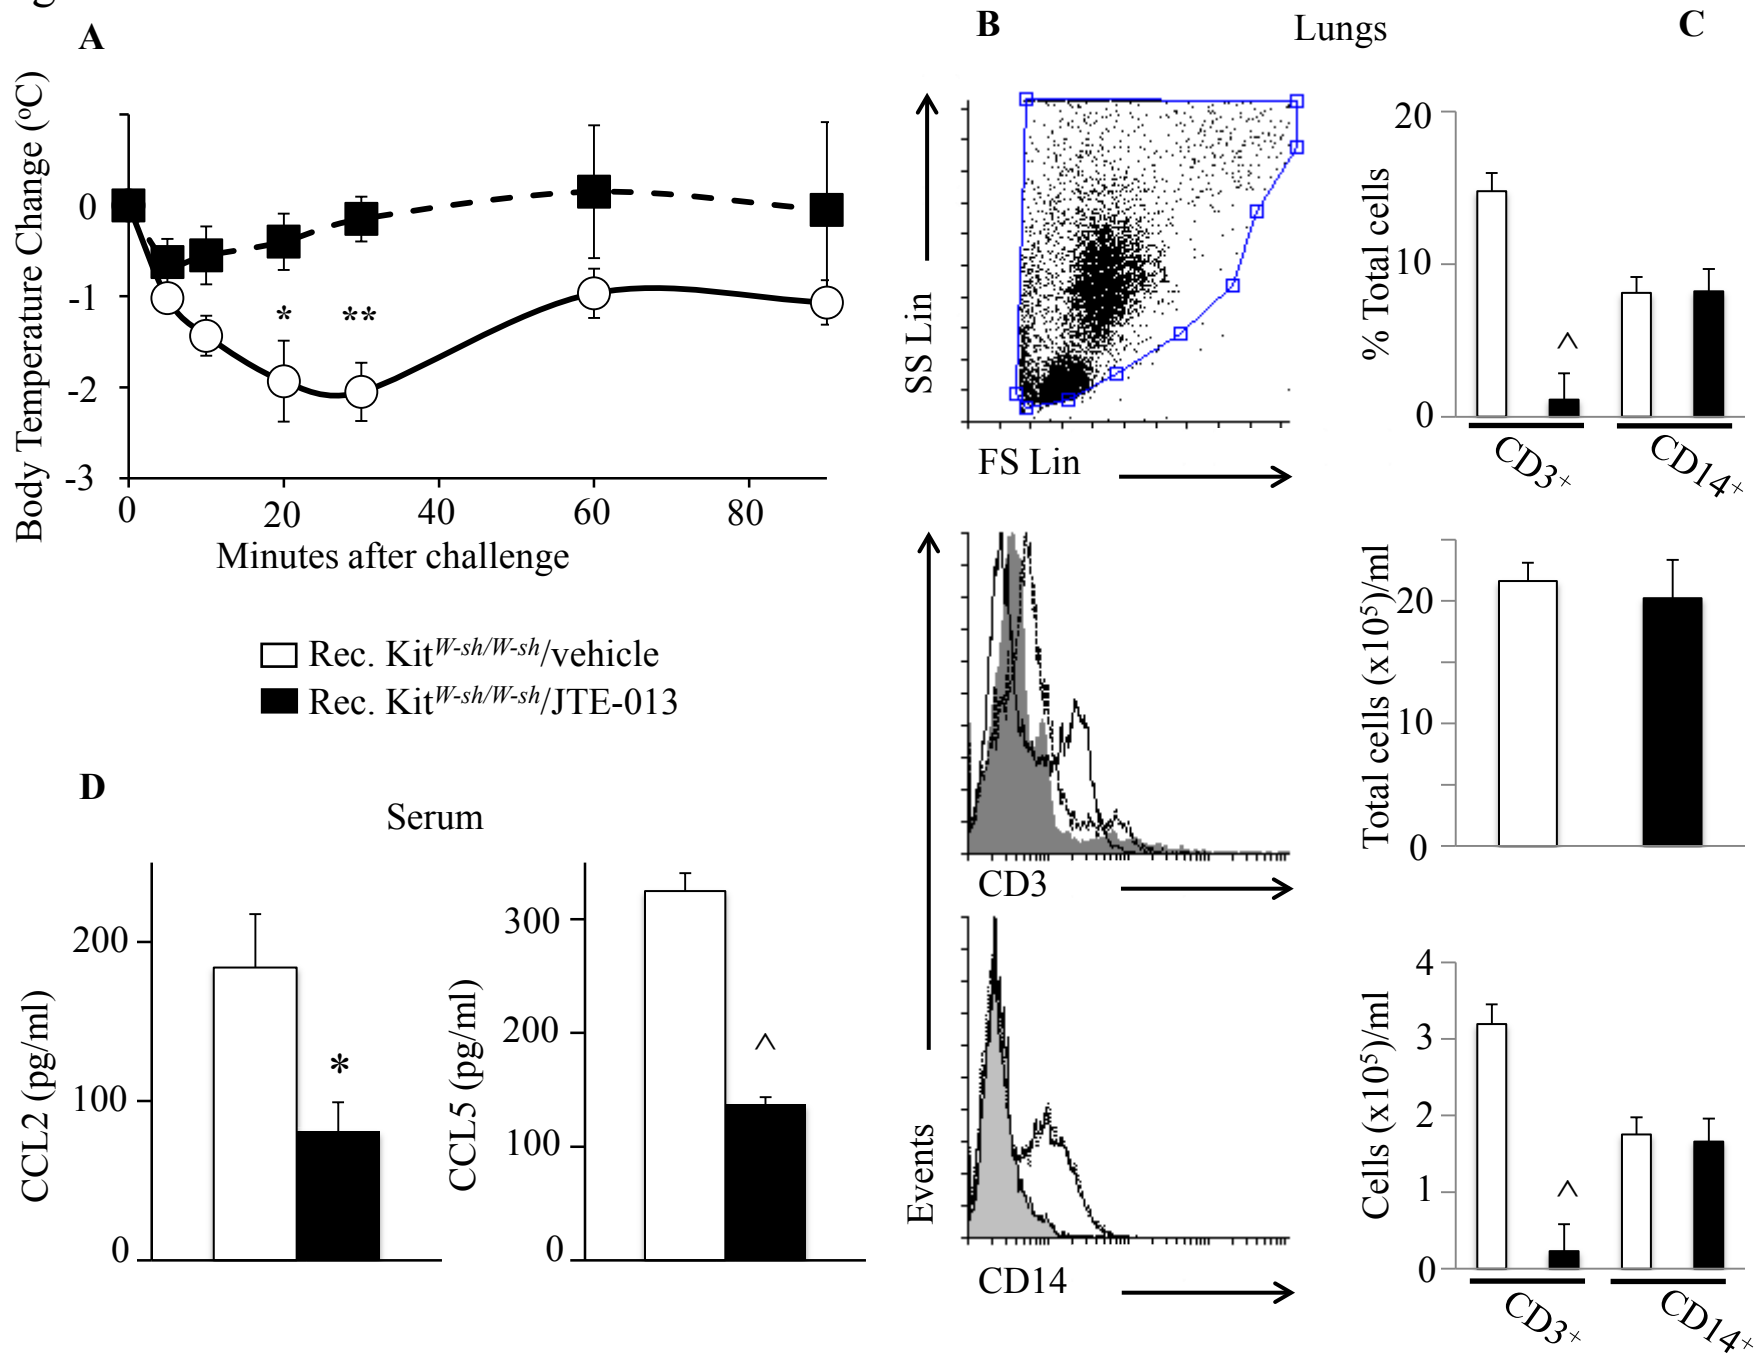

Supplement: NIHMS641194-supplement-01.pdf [file NIHMS641194-supplement-01.pdf]
